# Supplementary material for: Degradation of Polylactic Acid/Polypropylene Carbonate Films in Soil and Phosphate Buffer and Their Potential Usefulness in Agriculture and Agrochemistry
Source: MDPI journal article supplement (doi:10.3390/ijms25010653), 2024-01-04
Supplement: s1 [file s1]

# Degradation of Polylactic Acid/Polypropylene Carbonate Films in Soil and Phosphate Buffer and Their Potential Usefulness in Agriculture and Agrochemistry

Izabela Szymanek<sup>1</sup>, Martin Cvek<sup>2</sup>, Diana Rogacz<sup>1</sup>, Arkadiusz Żarski<sup>1</sup>, Kamila Lewicka<sup>1</sup>, Vladimír Sedlárik<sup>2</sup>, Piotr Rychter<sup>1\*</sup>

<sup>1</sup>Faculty of Science and Technology, Jan Długosz University in Częstochowa, 13/15 Armii Krajowej Av., 42-200 Częstochowa, Poland; izabela.szymanek@doktorant.ujd.edu.pl (IS), d.rogacz@ujd.edu.pl (DR), arkadiusz.zarski@ujd.edu.pl (AŻ), k.lewicka@ujd.edu.pl (KL), p.rychter@ujd.edu.pl (PR)

<sup>2</sup>Centre of Polymer Systems, University Institute, Tomas Bata University in Zlín, Trida T. Bati 5678, 760 01, Zlín, Czech Republic ; cvek@utb.cz (MC), sedlarik@utb.cz (VS)

\* Correspondence: p.rychter@ujd.edu.pl (PR)

## SUPPLEMENTARY DATA

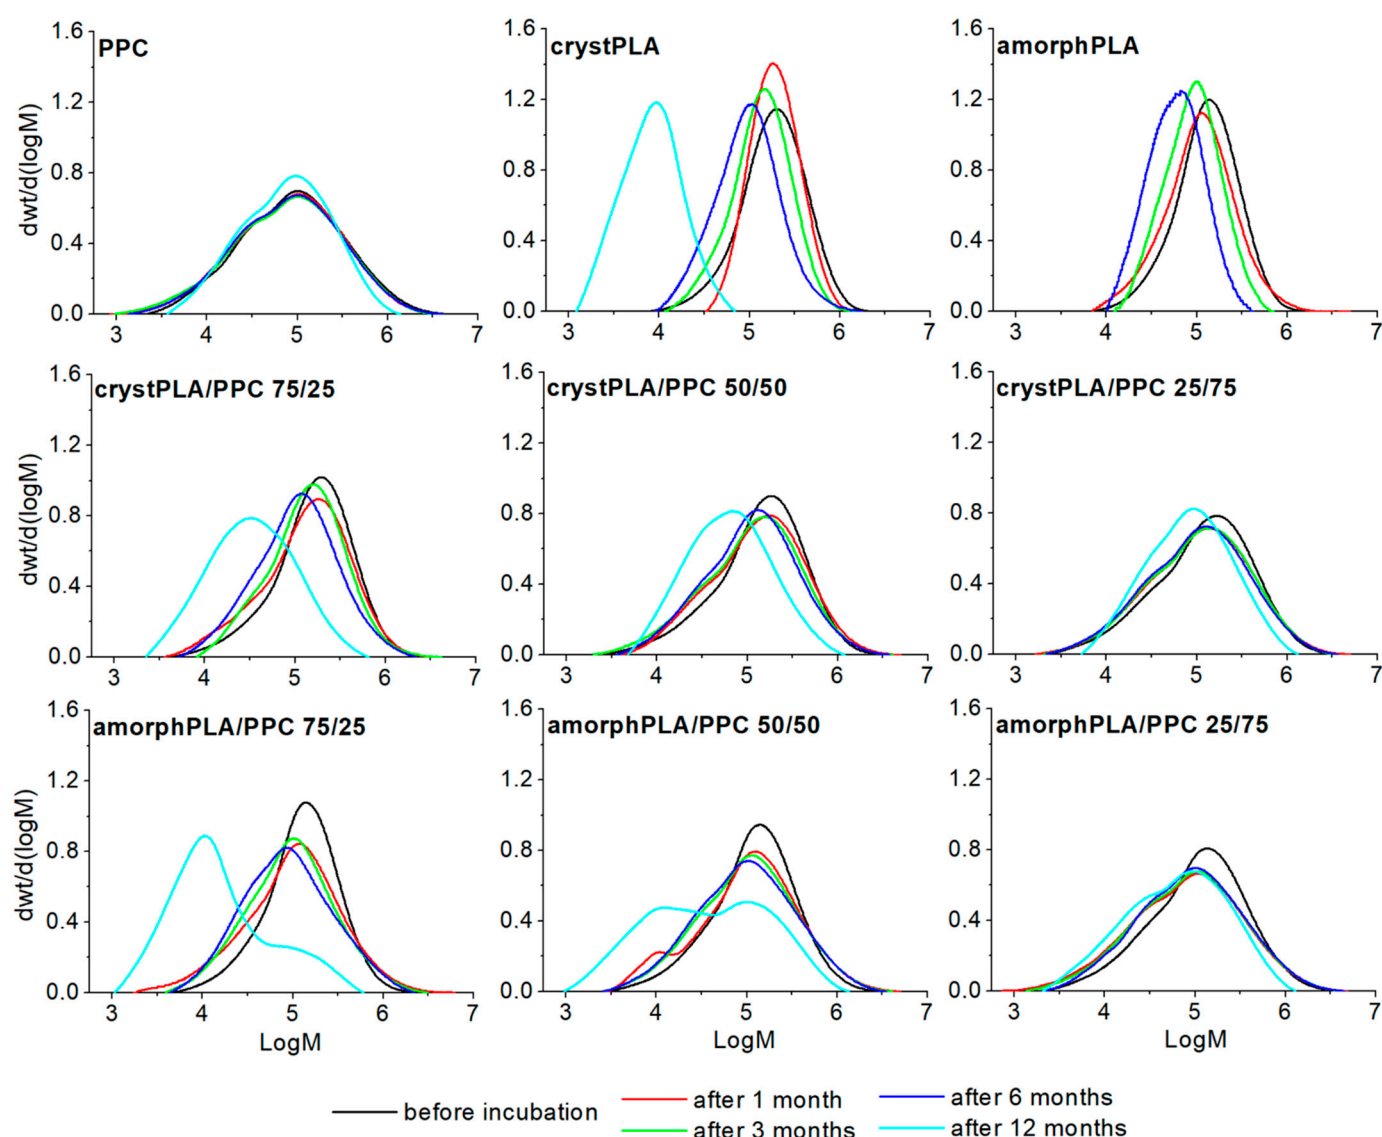

Figure S1. GPC elugrams of samples after incubation in PBS

**Table S1.** DSC data for the PLA/PPC blends (incubation in PBS) taken after erasing their thermal history (second heating scan).

|                          | $T_g^{PLA}$ (°C) | $T_g^{PPC}$ (°C) | $T_{cc}$ (°C) | $\Delta H_{cc}$ (J/g) | $T_m$ (°C)     | $\Delta H_m$ (J/g) | $\chi^c$ (%) |
|--------------------------|------------------|------------------|---------------|-----------------------|----------------|--------------------|--------------|
| <b>Before incubation</b> |                  |                  |               |                       |                |                    |              |
| PPC                      | N/D              | 11.8             | N/D           | N/D                   | N/D            | N/D                | N/D          |
| crystPLA                 | 44.6             | N/D              | 104.6         | 22.6                  | 139.8<br>144.4 | -25.0              | 2.58         |
| amorphPLA                | 38.5             | N/D              | N/D           | N/D                   | N/D            | N/D                | N/D          |
| crystPLA/PPC 75/25       | 38.6             | 19.1             | 103.8         | 19.9                  | 137.2<br>143.4 | -21.1              | 1.79         |
| crystPLA/PPC 50/50       | 35.5             | 14.3             | 101.6         | 13.7                  | 135.5<br>143.0 | -14.9              | 2.58         |
| crystPLA/PPC 25/75       | 36.8             | 17.1             | 101.8         | 7.41                  | 137.6<br>144.6 | -8.48              | 4.60         |
| amorphPLA/PPC 75/25      | 35.0             | 16.1             | N/D           | N/D                   | N/D            | N/D                | N/D          |
| amorphPLA/PPC 50/50      | 32.3             | 15.1             | N/D           | N/D                   | N/D            | N/D                | N/D          |
| amorphPLA/PPC 25/75      | 31.9             | 14.6             | N/D           | N/D                   | N/D            | N/D                | N/D          |
| <b>1 month</b>           |                  |                  |               |                       |                |                    |              |
| PPC                      | N/D              | 22.3             | N/D           | N/D                   | N/D            | N/D                | N/D          |
| crystPLA                 | 47.3             | N/D              | 103.2         | 34.1                  | 139.9<br>149.0 | -34.2              | 0.15         |
| amorphPLA                | 49.5             | N/D              | N/D           | N/D                   | N/D            | N/D                | N/D          |
| crystPLA/PPC 75/25       | 47.6             | 25.9             | 108.3         | 24.9                  | 142.3<br>149.3 | -26.2              | 1.79         |
| crystPLA/PPC 50/50       | 40.2             | 20.3             | 106.1         | 17.1                  | 140.4<br>147.9 | -18.3              | 2.49         |
| crystPLA/PPC 25/75       | 45.1             | 25.1             | 111.5         | 6.52                  | 144.2          | -6.90              | 1.63         |
| amorphPLA/PPC 75/25      | 42.1             | 24.0             | N/D           | N/D                   | N/D            | N/D                | N/D          |
| amorphPLA/PPC 50/50      | 40.8             | 22.8             | N/D           | N/D                   | N/D            | N/D                | N/D          |
| amorphPLA/PPC 25/75      | 42.9             | 26.0             | N/D           | N/D                   | N/D            | N/D                | N/D          |
| <b>3 months</b>          |                  |                  |               |                       |                |                    |              |
| PPC                      | N/D              | 25.3             | N/D           | N/D                   | N/D            | N/D                | N/D          |
| crystPLA                 | 48.6             | N/D              | 102.8         | 38.0                  | 140.2<br>149.5 | -38.5              | 0.54         |
| amorphPLA                | 50.3             | N/D              | N/D           | N/D                   | N/D            | N/D                | N/D          |
| crystPLA/PPC 75/25       | 46.4             | 25.0             | 108.1         | 29.4                  | 141.7<br>149.7 | -29.4              | 0.00         |
| crystPLA/PPC 50/50       | 48.6             | 27.3             | 108.9         | 16.0                  | 143.4<br>150.0 | -18.60             | 5.59         |
| crystPLA/PPC 25/75       | 47.2             | 28.3             | 115.2         | 5.89                  | 145.7*         | -6.64              | 3.23         |
| amorphPLA/PPC 75/25      | 44.1             | 26.4             | N/D           | N/D                   | N/D            | N/D                | N/D          |
| amorphPLA/PPC 50/50      | 43.4             | 25.8             | N/D           | N/D                   | N/D            | N/D                | N/D          |
| amorphPLA/PPC 25/75      | 44.1             | 27.5             | N/D           | N/D                   | N/D            | N/D                | N/D          |
| <b>6 months</b>          |                  |                  |               |                       |                |                    |              |
| PPC                      | N/D              | 25.1             | N/D           | N/D                   | N/D            | N/D                | N/D          |
| crystPLA                 | 48.6             | N/D              | 109.2         | 41.4                  | 142.3<br>150.6 | -41.4              | 0.00         |
| amorphPLA                | 49.2             | N/D              | N/D           | N/D                   | N/D            | N/D                | N/D          |
| crystPLA/PPC 75/25       | 46.3             | 26.2             | 113.5         | 29.6                  | 143.3<br>150.6 | -29.6              | 0.00         |
| crystPLA/PPC 50/50       | 46.1             | 25.3             | 108.8         | 19.2                  | 143.0<br>150.5 | -19.2              | 0.00         |
| crystPLA/PPC 25/75       | 54.6             | 34.4             | 116.3         | 5.40                  | 149.3*         | -5.40              | 0.00         |
| amorphPLA/PPC 75/25      | 45.1             | 28.7             | N/D           | N/D                   | N/D            | N/D                | N/D          |

|                     |      |      |      |      |                 |       |      |
|---------------------|------|------|------|------|-----------------|-------|------|
| amorphPLA/PPC 50/50 | 44.3 | 28.1 | N/D  | N/D  | N/D             | N/D   | N/D  |
| amorphPLA/PPC 25/75 | 44.3 | 28.2 | N/D  | N/D  | N/D             | N/D   | N/D  |
| <b>12 months</b>    |      |      |      |      |                 |       |      |
| PPC                 | N/D  | 26.9 | N/D  | N/D  | N/D             | N/D   | N/D  |
| crystPLA            | 39.1 | N/D  | 95.5 | 45.8 | 127.1<br>138.6  | -42.3 | 0.00 |
| amorphPLA           | 26.8 | N/D  | N/D  | N/D  | N/D             | N/D   | N/D  |
| crystPLA/PPC 75/25  | 43.3 | 26.1 | 95.8 | 33.5 | 137.8<br>146.7  | -32.4 | 0.00 |
| crystPLA/PPC 50/50  | 42.0 | 26.9 | 96.5 | 20.7 | 138.5<br>147.8  | -20.7 | 0.00 |
| crystPLA/PPC 25/75  | 49.7 | 31.4 | N/D  | N/D  | 149.9*<br>152.2 | -7.6  | 0.00 |
| amorphPLA/PPC 75/25 | 44.7 | 31.7 | N/D  | N/D  | N/D             | N/D   | N/D  |
| amorphPLA/PPC 50/50 | 44.5 | 31.9 | N/D  | N/D  | N/D             | N/D   | N/D  |
| amorphPLA/PPC 25/75 | 46.0 | 33.0 | N/D  | N/D  | N/D             | N/D   | N/D  |

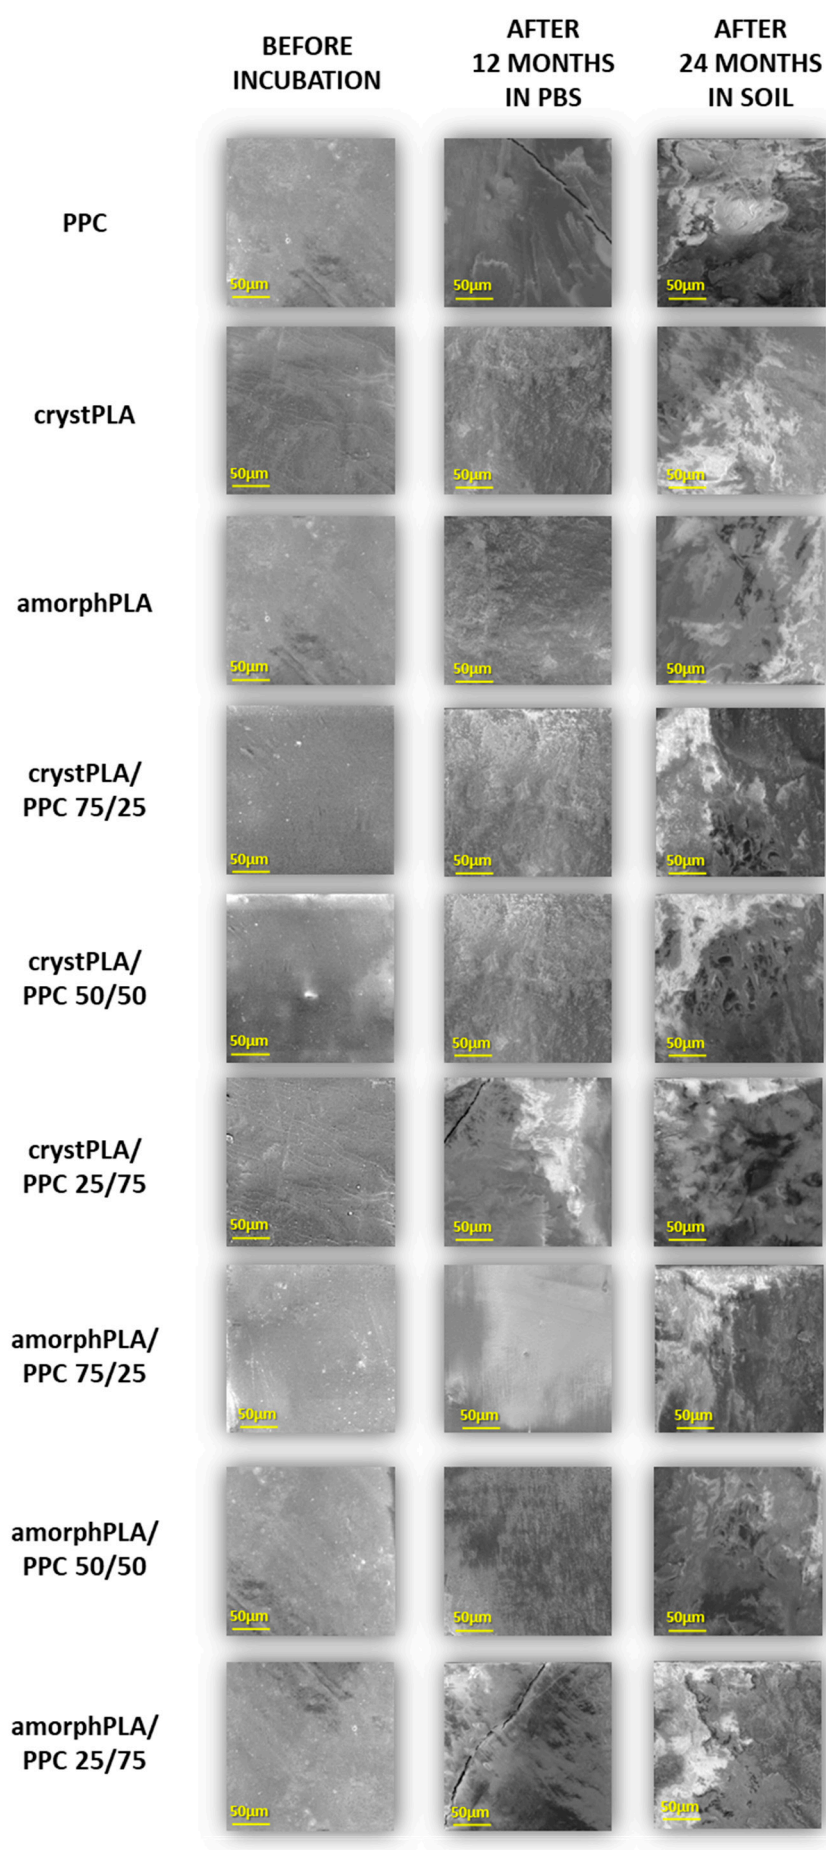

**Figure S2.** A list of the SEM micrographs of the surfaces of incubated foils before and during incubation.
